# Supplementary material for: Circular RNA expression profile of lung squamous cell carcinoma: identification of potential biomarkers and therapeutic targets
Source: PubMed Central journal article supplement (PMC7189478; doi:10.1042/bsr20194512), 2020-04-28
Supplement: BSR-2019-4512_supp.pdf [file BSR-2019-4512_supp.pdf]

Significant Enriched KEGG\_PATHWAY

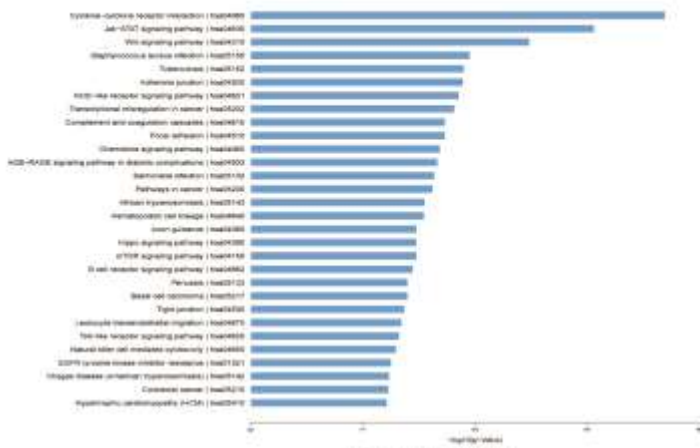

Significant Enriched KEGG\_PATHWAY

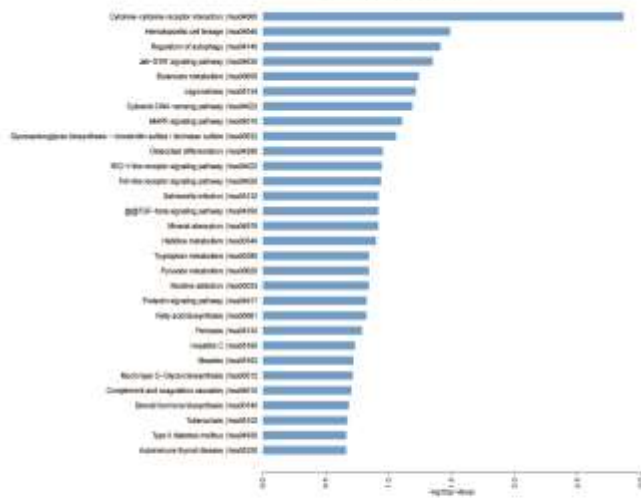

Significant Enriched KEGG\_PATHWAY

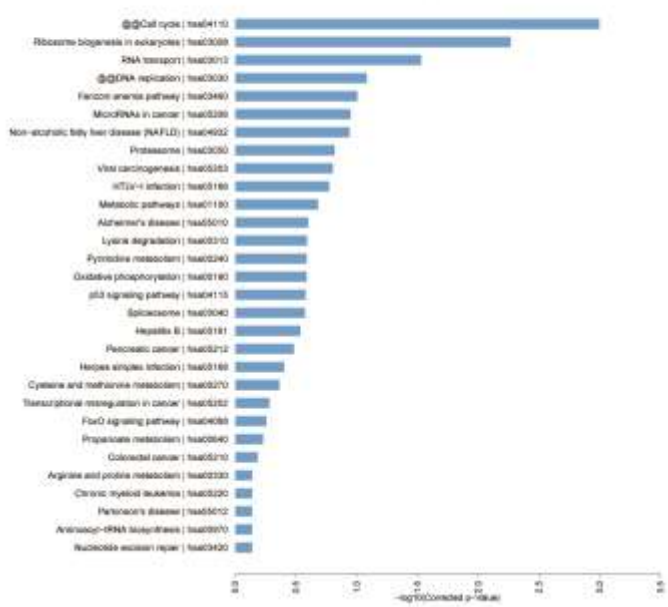

**Supplementary Figure 1.** KEGG analyses of indirectly targeted mRNAs of hsa\_circ\_0014235, hsa\_circ\_0025580 and hsa\_circ\_0026403 in circRNAs-miRNAs-mRNAs network.
